# Supplementary material for: HIV infection drives interferon signaling within intestinal SARS-CoV-2 target cells
Source: PubMed Central journal article supplement (PMC8409978; doi:10.1172/jci.insight.148920), 2021-08-23
Supplement: jciinsight-6-148920-s200.pdf [file jciinsight-6-148920-s200.pdf]

## **Supplementary information**

Supplemental information includes 6 Figures and 3 Tables

### **Figure S1-S6**

**Table S1** Individual study participant information

**Table S2A** List of differentially expressed genes defining cell type in duodenum

**Table S2B** List of differentially expressed genes upregulated in ACE2+ Epithelial Cells vs. ACE2- Epithelial Cells from scRNA-seq.

**Table S2C** List of differentially expressed genes upregulated in ACE2+/TMPRSS2+ Remaining Epithelial vs. All Remaining Epithelial

**Table S2D** Predicted upstream drivers of DE response between ACE2+ Epithelial cells and ACE2- Epithelial cells from duodenum

**Table S3A** Statistics for ACE2 and TMPRSS2 enrichment in duodenum epithelial cells

**Table S3B** List of differentially expressed genes upregulated in HIV+ Absorptive Cells vs HIV- Absorptive Cells

**Table S3C** List of differentially expressed genes upregulated in ACE2+HIV+ Absorptive Cells vs ACE2+HIV- Absorptive Cells

**Table S3D** Statistics for Genes Significantly Upregulated in ACE2+HIV+ (ART) Absorptive Cells vs ACE2+HIV- Absorptive Cells

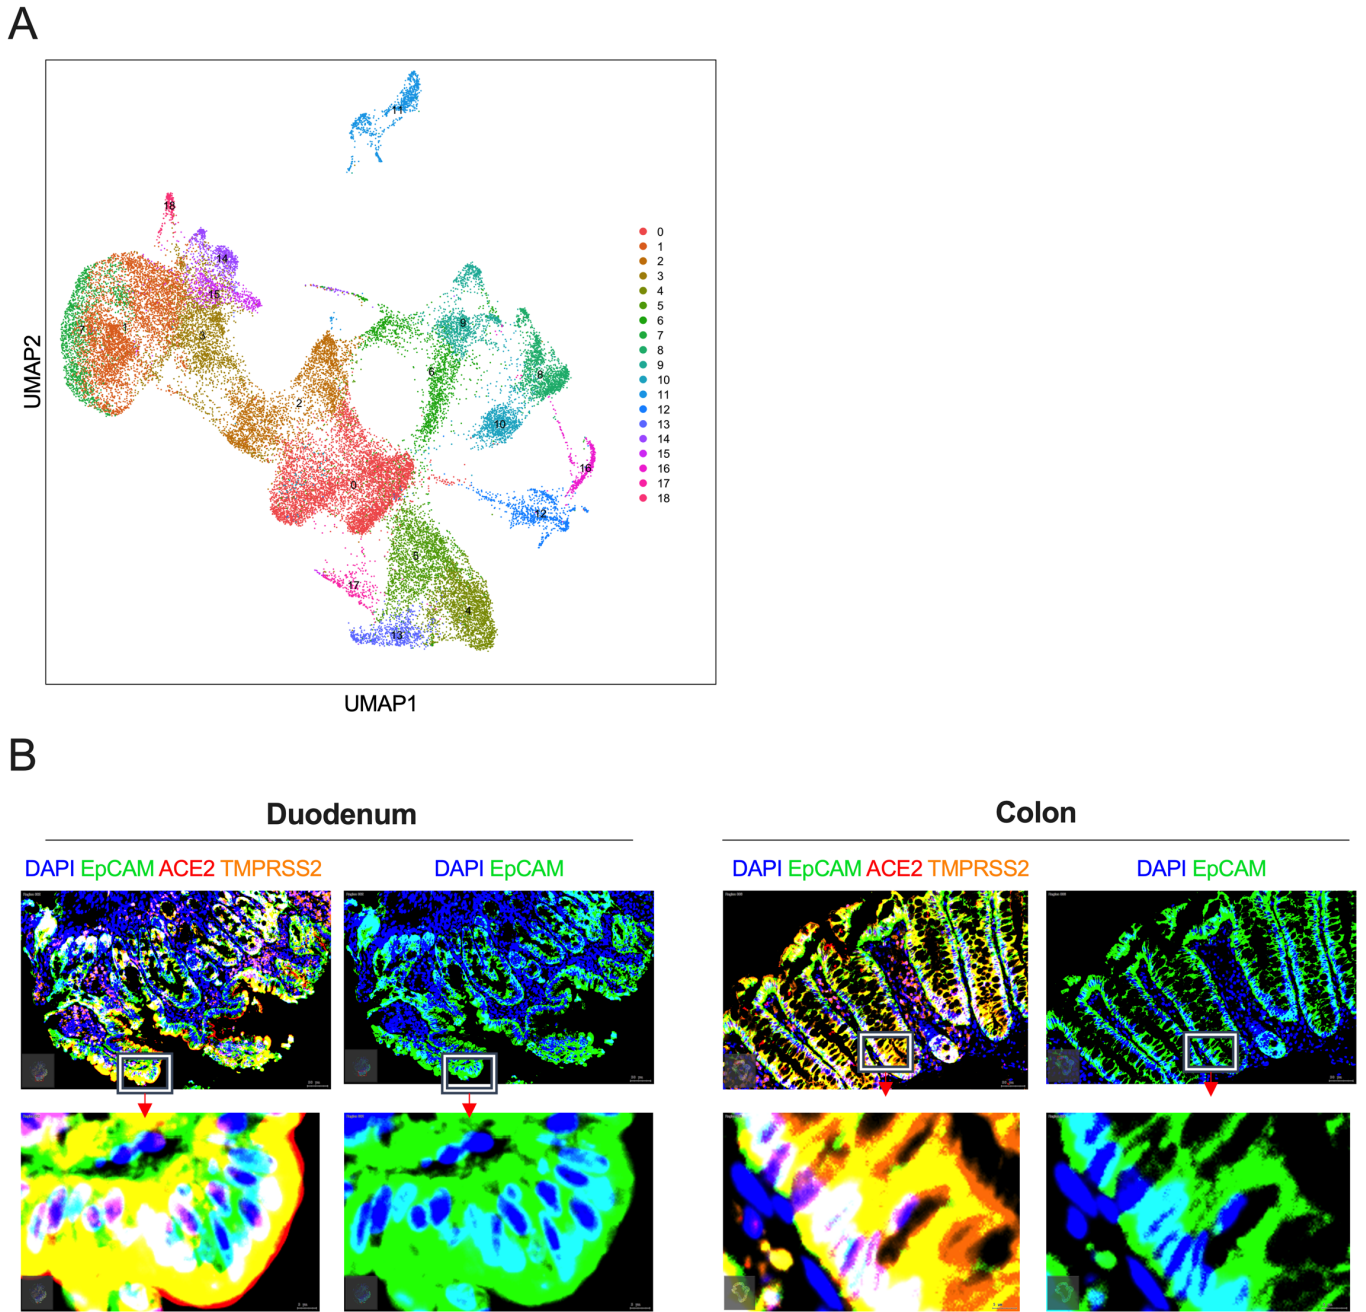

**Figure S1 - related to Figure 1**

**A.** UMAP of 32381 cells, identifying 18 different clusters **B.** Representative fluorescent immunohistochemistry image of gut tissue showing *ACE2* (red), *TMPRSS2* (orange), EpCAM (green) and DAPI (blue) of duodenum and colon. Bars, 20  $\mu$ m for all images.

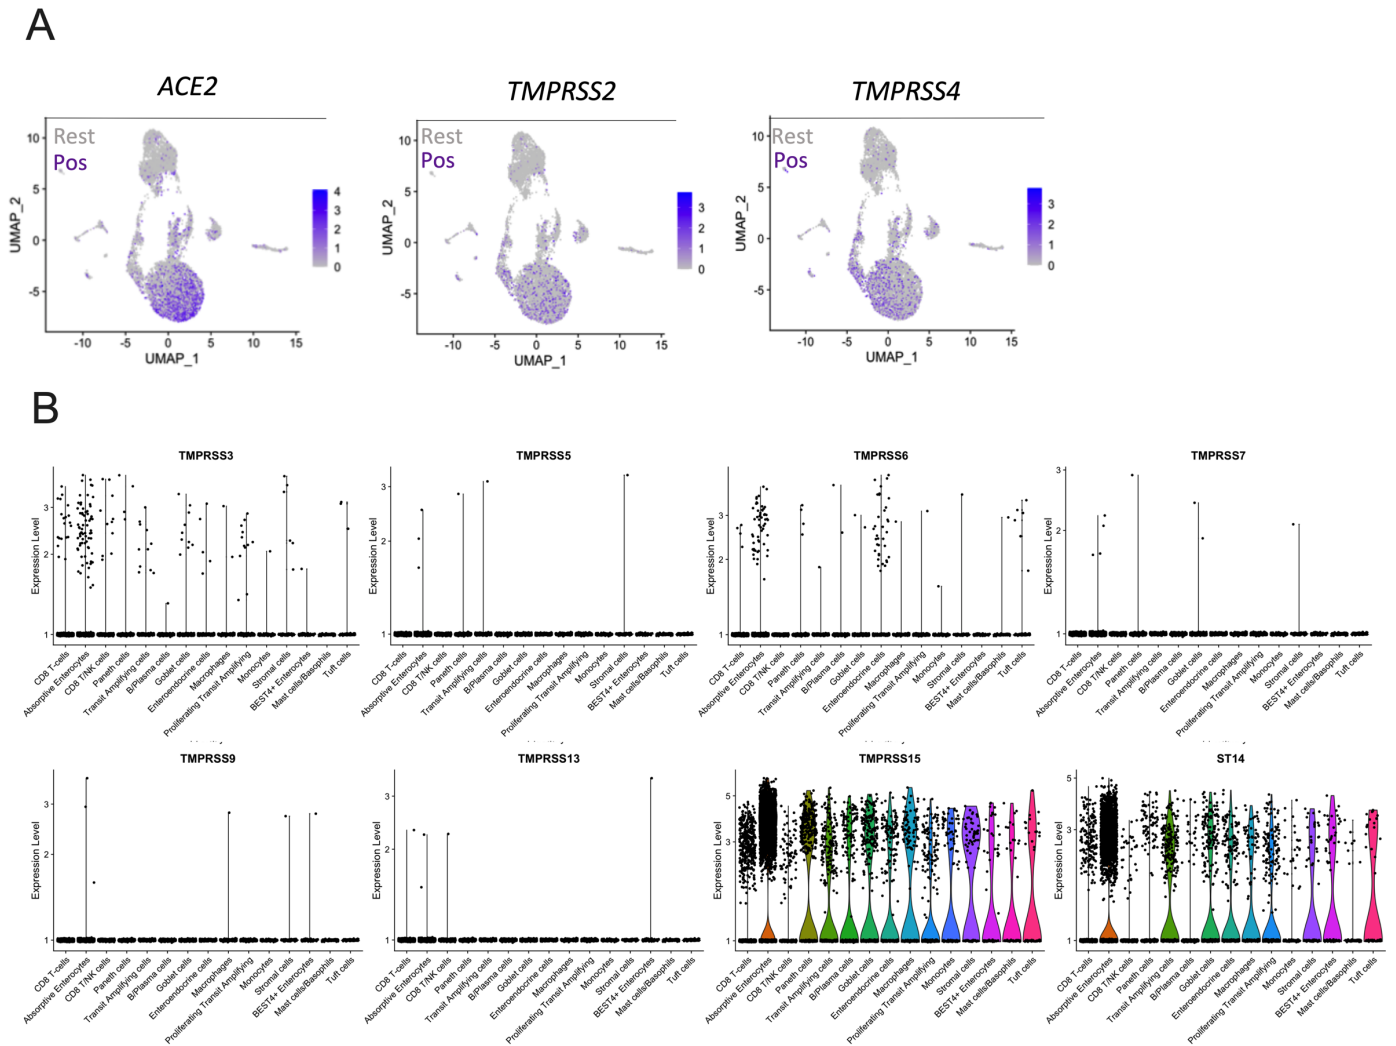

**Figure S2 - related to Figure 2**

**A.** UMAP projection of all cells from duodenal biopsies with points coloured by detection of *ACE2* (left), *TMPRSS2* (middle) and *TMPRSS4*, (left). Colour coding is as follows: purple, RNA positive, grey, RNA negative with 'Rest' referring to cell not expressing the indicated marker. **B.** Violin plot of different serine protease expression in the duodenum.

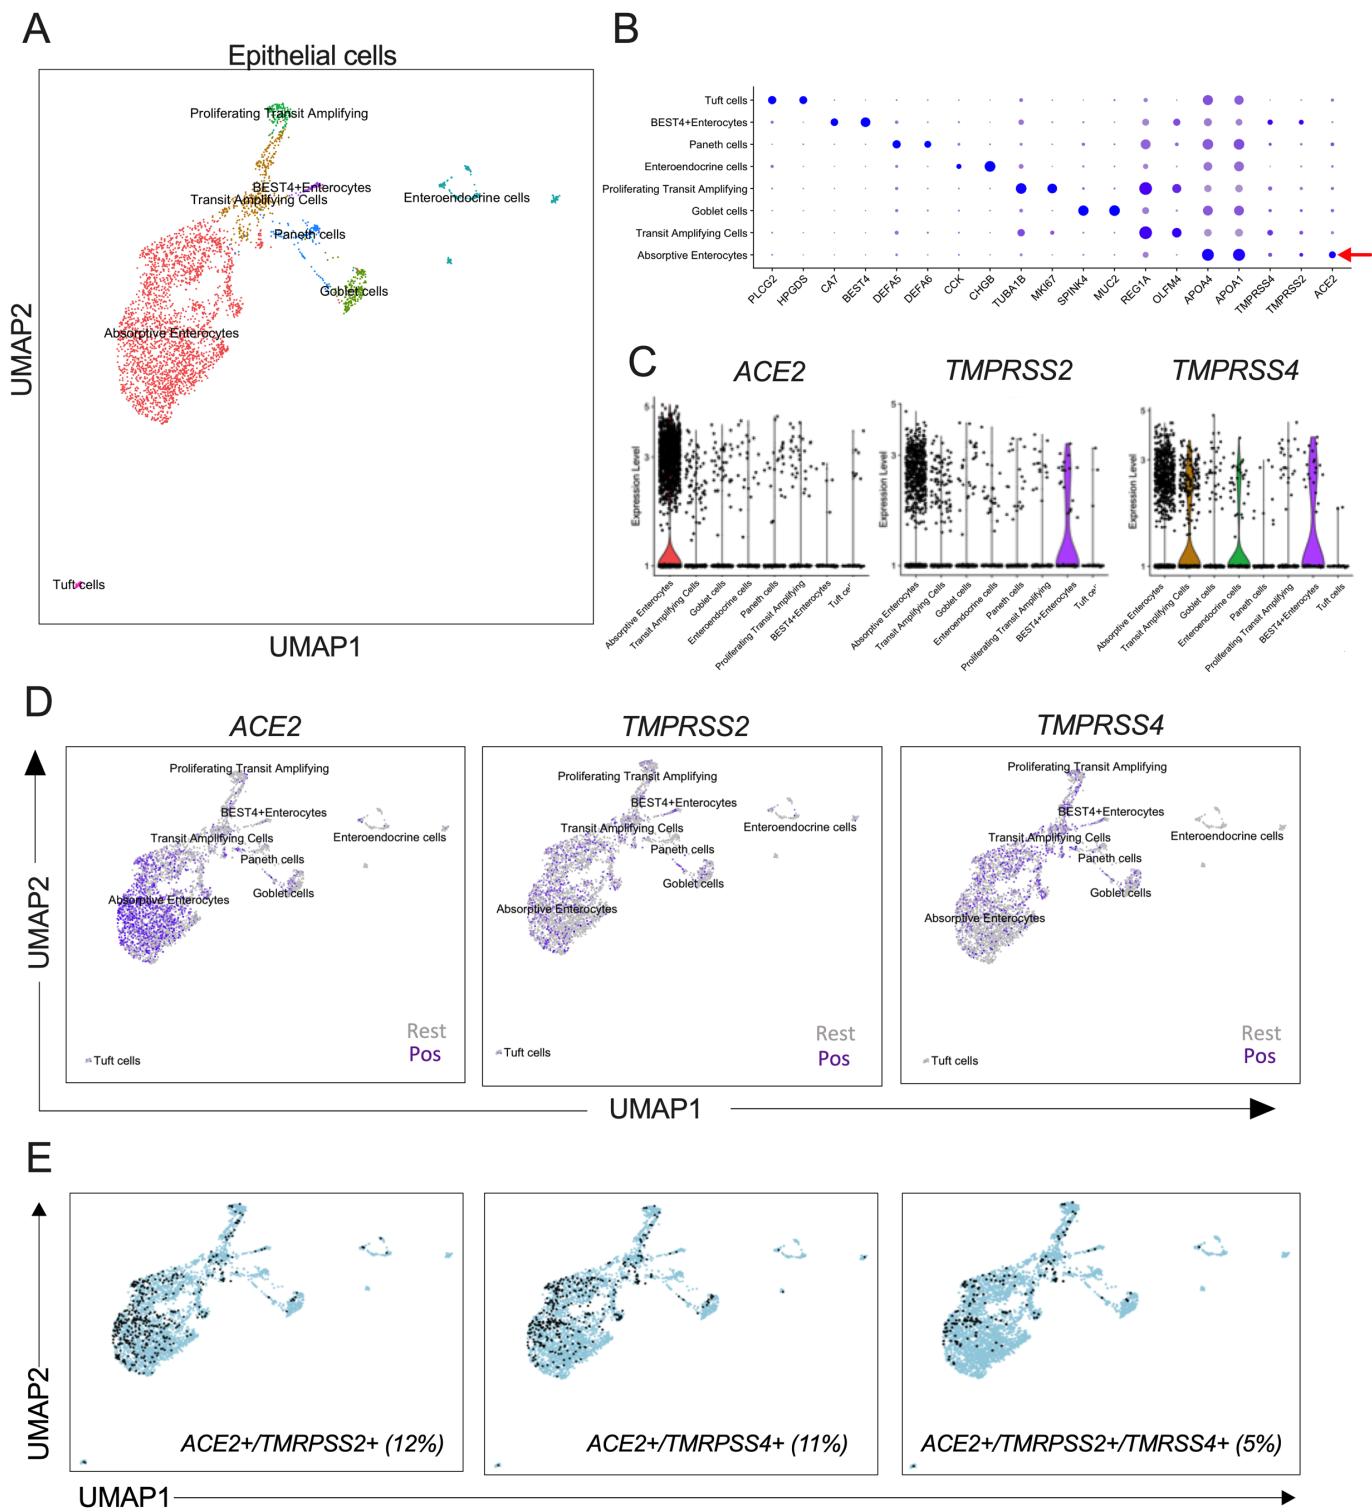

**Figure S3 - related to Figure 2**

**A.** UMAP of 5927 epithelial cells coloured by cellular subsets **B.** Dot plot of 2 defining genes of each cell type, with *ACE2*, *TMPRSS2* and *TMPRSS4*. Dot size represents fraction of cells within cell type expressing a given gene, and colour intensity represents binned count-based expression amounts (log(scaled UMI+1)) among expressing cells. Red arrow indicate cell type with largest proportion of *ACE2*+*TMPRSS2*+*TMPRSS4*+ cells. **C.** Expression of *ACE2* (left), *TMPRSS2* (middle) and *TMPRSS4* (right) among all epithelial subsets from duodenum. **D.** UMAP projection as in (A) but with overlay of cells expressing *ACE2* (left), *TMPRSS2* (middle) and *TMPRSS4* (right) colour coded as purple=RNA positive and grey=RNA negative with 'Rest' referring to cells not expressing the indicated marker. **E.** UMAP projection of cells co-expressing *ACE2*+*TMPRSS2*+ (left), *ACE2*+*TMPRSS4*+ (middle) and *ACE2*+*TMPRSS2*+*TMPRSS4*+ cells (right) among all epithelial cells.

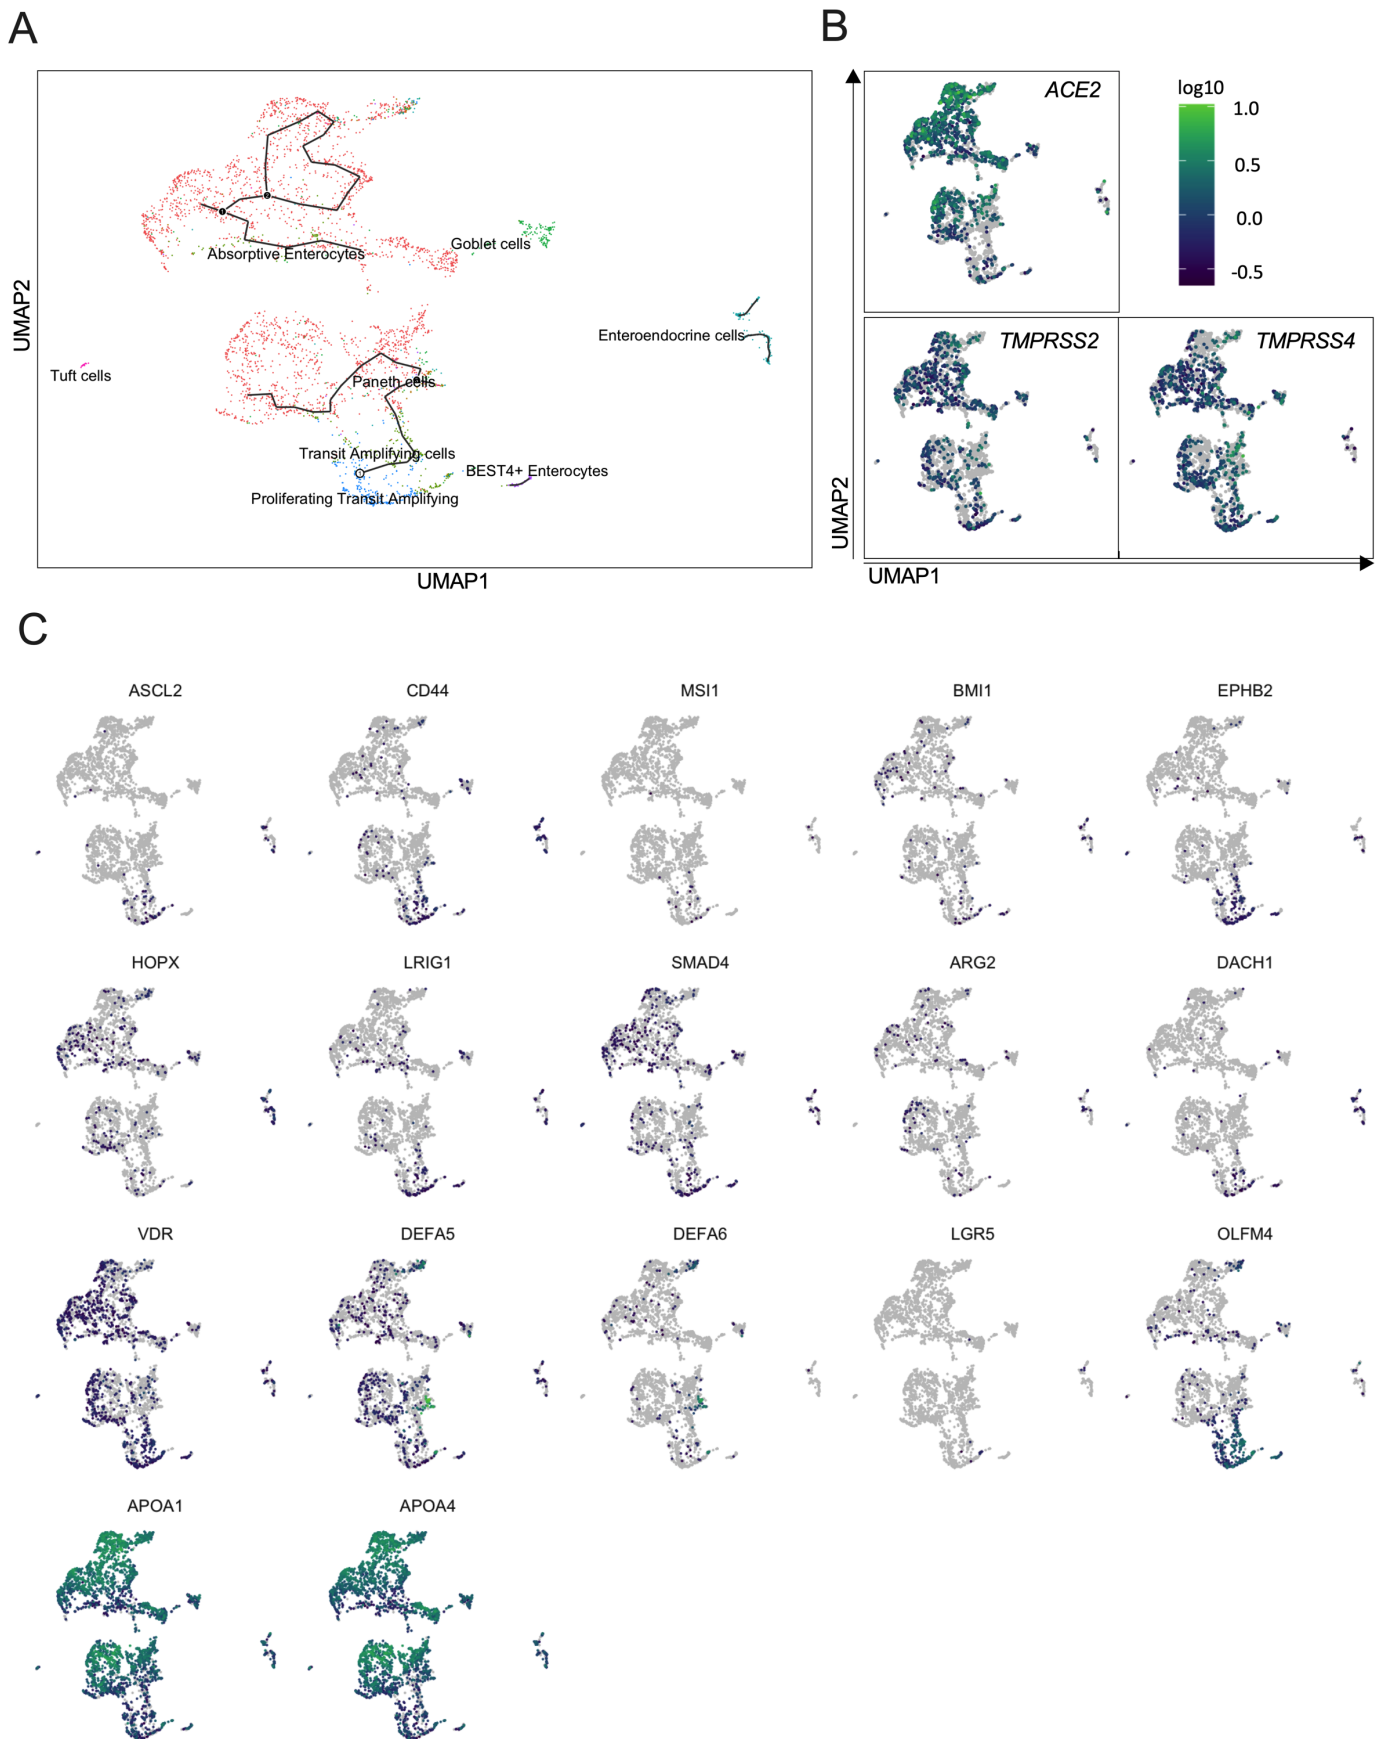

**Figure S4 - related to Figure 2**

**A.** UMAP plot showing genes specifically expressed in intestinal stem cell on the monocle map, showing different stages of epithelial cell differentiation. **B.** Monocle map showing the overaly of *ACE2*, *TMPRSS2* and *TMPRSS4* expression on to the monocle map in A. **C.** Monocle map show overlay of indated gene expression relevant for cellular identification shown in A.

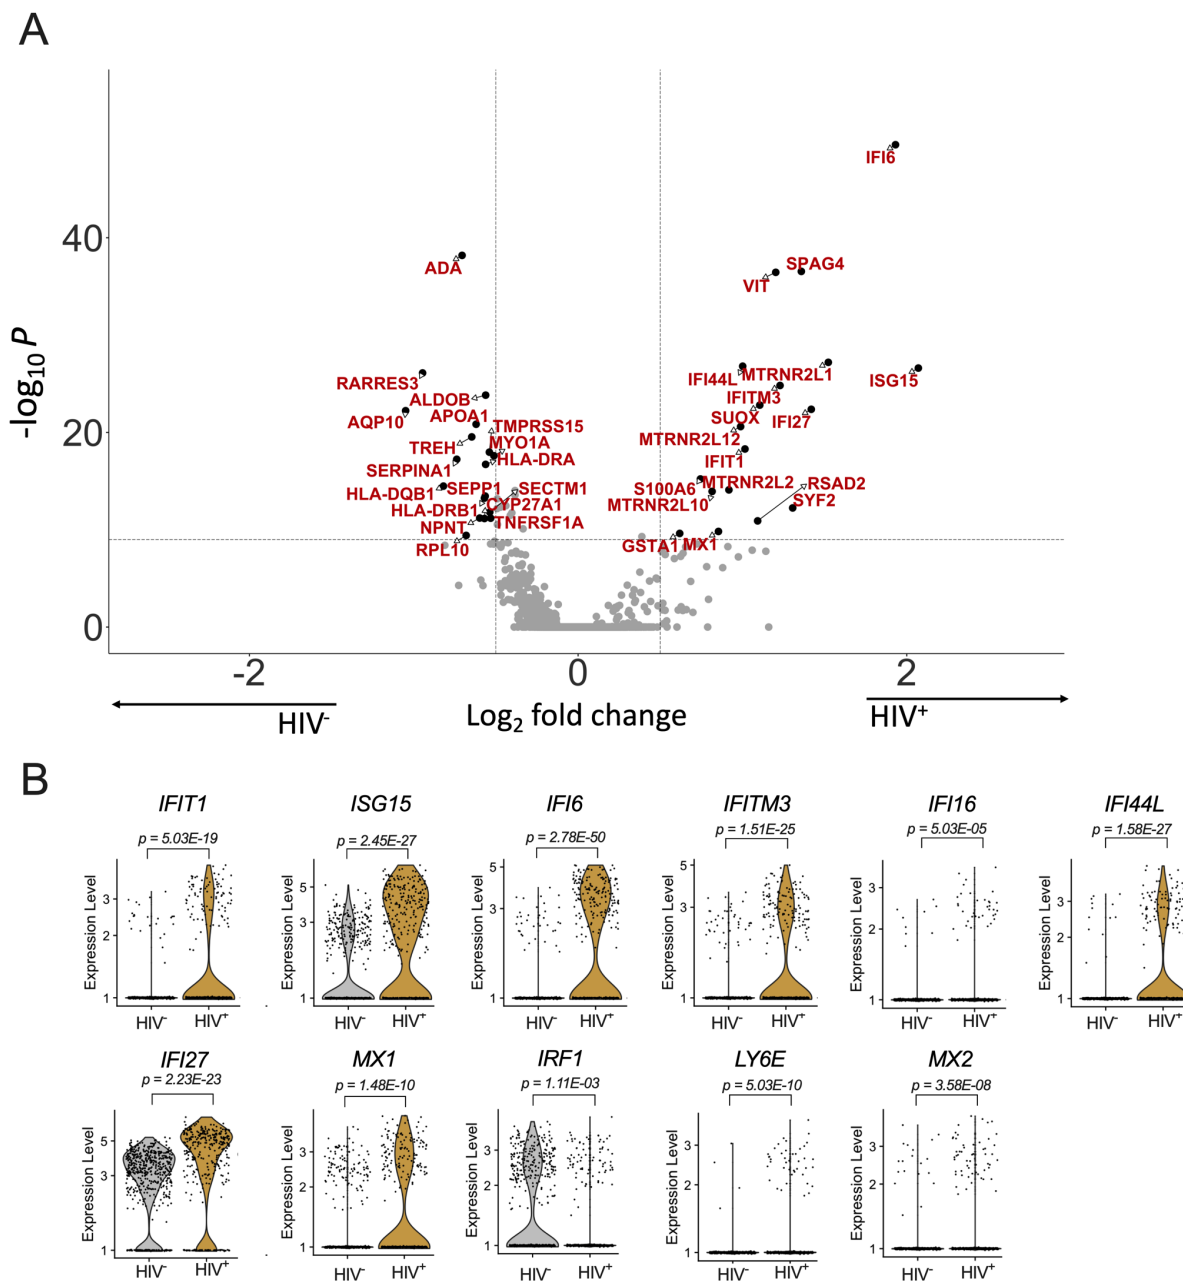

**Figure S5 - related to Figure 3**

**A.** Volcano plot of DEGs within absorptive enterocytes expressing ACE2 comparing HIV uninfected (n=4) and HIV infected individuals (n=5) and highlighting genes in red with more than 0.5 fold change and adjusted P-values  $P_{adj} < 5.0E-10-08$ . Genes differentially expressed among ACE2 expressing absorptive enterocytes comparing HIV uninfected and HIV infected individuals. FDR-adjusted  $p < 0.05$ ; full results can be found in Table S3C).

**A**

Absorptive enterocytes

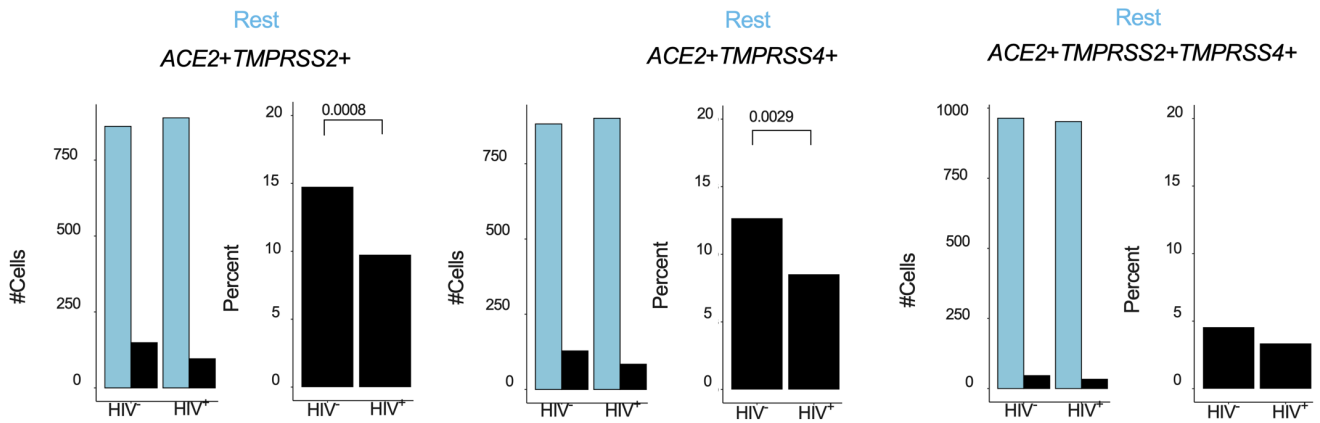

**B**

Goblet Cells

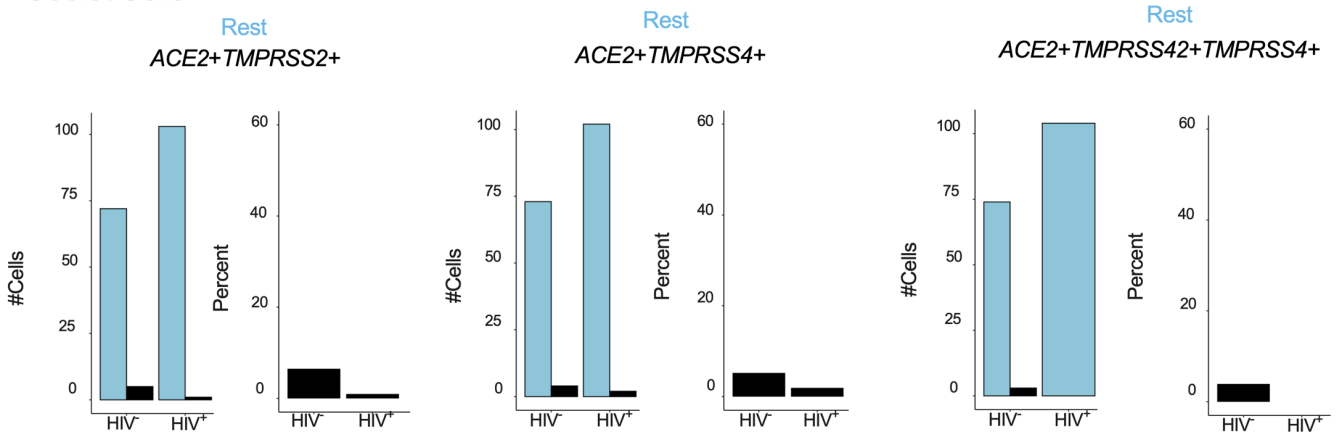

**C**

Amplifying Cells

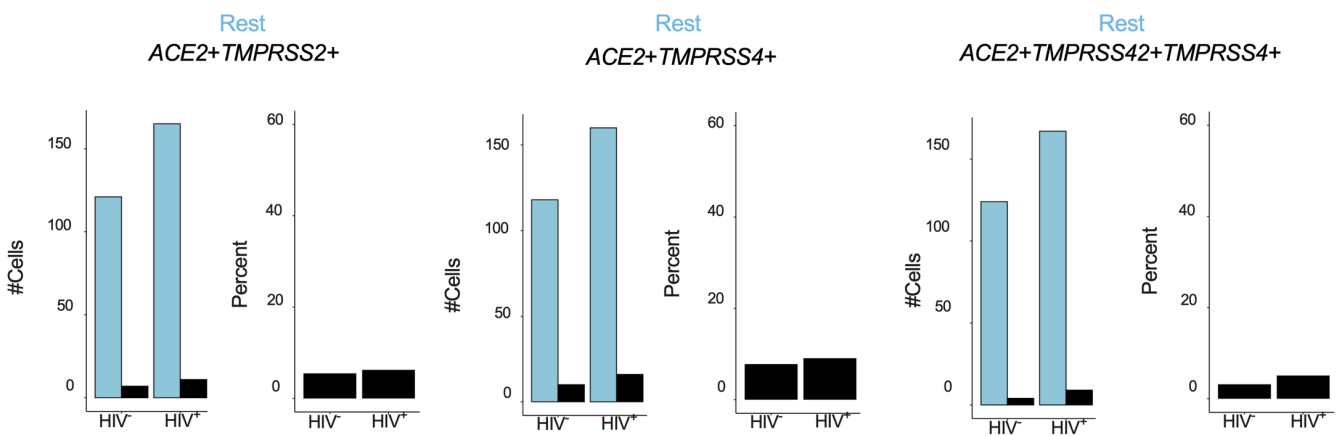

**Figure S6 - related to Figure 4**

Actual number of cells (left) and % (right) of co-expressing *ACE2+TMPRSS2+*, *ACE2+TMPRSS4+* and *ACE2+TMPRSS2+TMPRSS4+* positive cells by HIV status for **A.** Absorptive enterocytes, **B.** Goblet cells and **C.** Transit Amplifying. *P*-values by Fisher's Exact Test.
